# Supplementary figures and images for: Controllable reconstruction of lignified biomass with molecular scissors to form carbon frameworks for highly stable Li metal batteries
Source: Royal Society of Chemistry journal article supplement (doi:10.1039/d4sc07374f), 2024-12-16

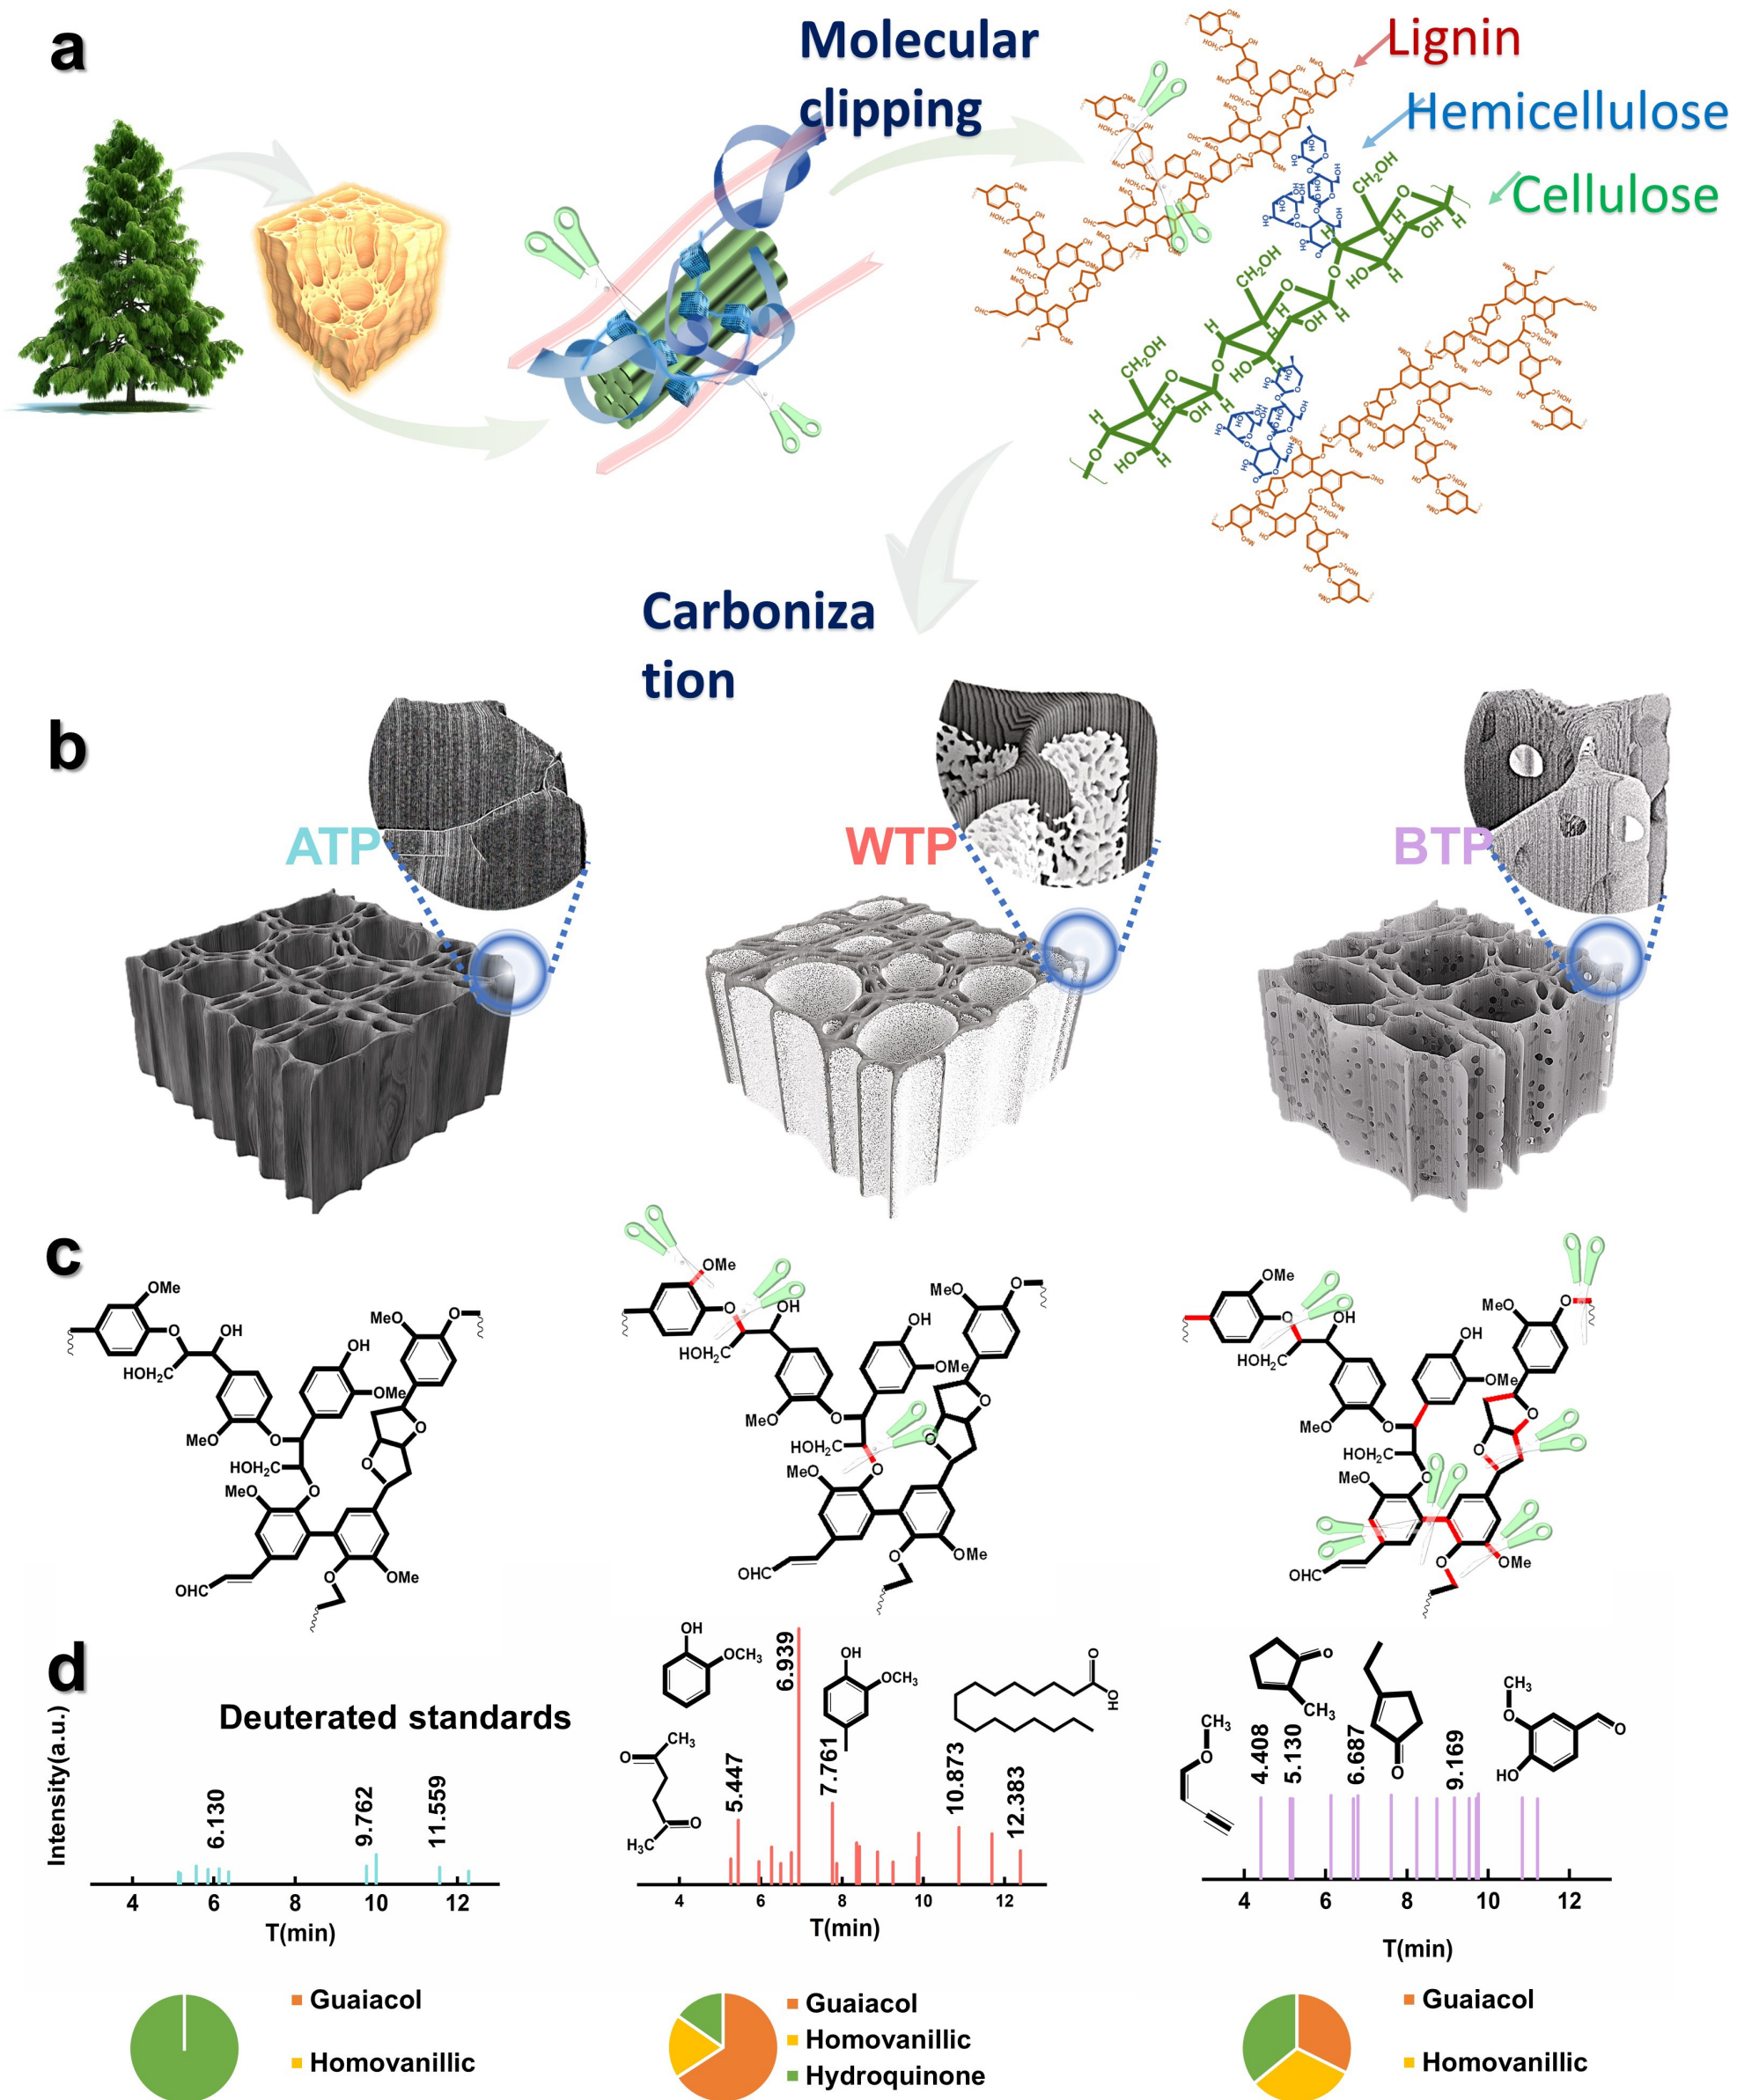

Supplement: d4sc07374f3.pdf [file d4sc07374f3.pdf]
